# Supplementary material
Source: MDPI journal article supplement (https://www.mdpi.com/1424-2818/13/5/196)
Supplement: s1 [file s1]

**Table S1.** Specimens used in analysis with assigned taxon name, BOLD Process ID number, GenBank Accession number and Inventory numbers. Placement location is the Invertebrates DNA Barcode collection at the Juraj Dobrila University of Pula.

| No.               | Taxon name                                       | BOLD Process ID                                                              | GenBank Accession number                                   | Inventory number                                           |
|-------------------|--------------------------------------------------|------------------------------------------------------------------------------|------------------------------------------------------------|------------------------------------------------------------|
| <u>GASTROPODA</u> |                                                  |                                                                              |                                                            |                                                            |
| 1                 | <i>Alvania</i> sp. Risso, 1826                   | CROMI045-19                                                                  | MT920119                                                   | CROBB257                                                   |
| 2                 | <i>cf. Alvania carinata</i> (da Costa, 1778)     | CROMI041-19                                                                  | MT920118                                                   | CROBB253                                                   |
| 3                 | <i>Bittium reticulatum</i> (da Costa, 1778)      | CROMI001-19                                                                  | MT920123                                                   | CROBB263                                                   |
| 4                 | <i>cf. Crisilla maculata</i> (Monterosato, 1869) | CROMI038-19, CROMI039-19                                                     | MT920131, MT920132                                         | CROBB381, CROBB382                                         |
| 5                 | <i>Eatonina</i> sp. Thiele, 1912                 | CROMI010-19                                                                  | MT920134                                                   | CROBB93                                                    |
| 6                 | <i>Eatonina cossurae</i> (Calcara, 1841)         | CROMI057-19                                                                  | MT920133                                                   | CROBB409                                                   |
| 7                 | <i>Episcomitra cornicula</i> (Linnaeus, 1758)    | CROMI043-19                                                                  | MT920135                                                   | CROBB385                                                   |
| 8                 | <i>Gibbula turbinoides</i> (Deshayes, 1835)      | CROMI042-19, CROMI047-19                                                     | MT920138, MT920139                                         | CROBB254, CROBB260                                         |
| 8                 | <i>Megastomia winfriedi</i> Peñas & Rolán, 1999  | CROMI008-19, CROMI061-19                                                     | MT920146, MT920145                                         | CROBB91, CROBB414                                          |
| 9                 | <i>Ocenebra cf. edwardsii</i> (Payraudeau, 1826) | CROMI059-19                                                                  | MT920153                                                   | CROBB412                                                   |
| 10                | <i>Odostomia plicata</i> (Montagu, 1803)         | CROMI048-19                                                                  | MT920154                                                   | CROBB261                                                   |
| 11                | <i>Patella caerulea</i> Linnaeus, 1758           | CROMI046-19                                                                  | MT920156                                                   | CROBB374                                                   |
| 12                | <i>Phorcus turbinatus</i> (Born, 1778)           | CROMI002-19, CROMI058-19                                                     | MT920157, MT920158                                         | CROBB246, CROBB410                                         |
| 13                | <i>Rissoella</i> sp. Gray, 1847                  | CROMI009-19, CROMI034-19, CROMI053-19, CROMI060-19                           | MT920162, MT920161, MT920160, MT920163                     | CROBB92, CROBB126, CROBB376, CROBB413                      |
| 14                | Gastropoda indet.                                | CROMI007-19                                                                  | MT920137                                                   | CROBB89                                                    |
| 15                | <i>Steromphala adriatica</i> (Philippi, 1844)    | CROMI040-19                                                                  | MT920164                                                   | CROBB383                                                   |
| 16                | <i>Vitreolina antiflexa</i> (Monterosato, 1884)  | CROMI044-19                                                                  | MT920177                                                   | CROBB255                                                   |
| <u>BIVALVIA</u>   |                                                  |                                                                              |                                                            |                                                            |
| 17                | <i>Cardita calyculata</i> (Linnaeus, 1758)       | CROMI017-19, CROMI018-19, CROMI019-19, CROMI020-19, CROMI027-19, CROMI035-19 | MT920129, MT920124, MT920125, MT920128, MT920127, MT920126 | CROBB106, CROBB107, CROBB108, CROBB109, CROBB118, CROBB132 |
| 18                | <i>Chama gryphoides</i> Linnaeus, 1758           | CROMI014-19                                                                  | MT920130                                                   | CROBB99                                                    |
| 19                | <i>Gregariella semigranata</i> (Reeve, 1858)     | CROMI062-19                                                                  | MT920140                                                   | CROBB415                                                   |
| 20                | <i>Lasaea cf. rubra</i> (Montagu, 1803)          | CROMI006-19                                                                  | MT920142                                                   | CROBB265                                                   |
| 21                | <i>Lithophaga lithophaga</i> (Linnaeus, 1758)    | CROMI013-19                                                                  | MT920143                                                   | CROBB266                                                   |

|    |                                                     |                                                                                    |                                                                  |                                                                  |
|----|-----------------------------------------------------|------------------------------------------------------------------------------------|------------------------------------------------------------------|------------------------------------------------------------------|
| 22 | <i>Lucinella</i> sp. Monterosato, 1884              | CROMI016-19                                                                        | MT920144                                                         | CROBB105                                                         |
| 23 | <i>Musculus</i> cf. <i>costulatus</i> (Risso, 1826) | CROMI003-19, CROMI005-19                                                           | MT920148, MT920147                                               | CROBB248, CROBB264                                               |
| 24 | <i>Musculus</i> sp. Röding, 1798                    | CROMI015-19                                                                        | MT920149                                                         | CROBB104                                                         |
| 25 | <i>Mytilus galloprovincialis</i> Lamarck, 1819      | CROMI004-19, CROMI052-19,<br>CROMI056-19                                           | MT920150, MT920151,<br>MT920152                                  | CROBB75, CROBB271,<br>CROBB388                                   |
| 26 | <i>Striarca lactea</i> (Linnaeus, 1758)             | CROMI011-19                                                                        | MT920165                                                         | CROBB94                                                          |
| 27 | Veneridae indet. 1 Rafinesque, 1815                 | CROMI012-19, CROMI029-19,<br>CROMI030-19                                           | MT920166, MT920173,<br>MT920168                                  | CROBB97, CROBB249,<br>CROBB250                                   |
| 28 | Veneridae indet. 2 Rafinesque, 1815                 | CROMI021-19, CROMI022-19,<br>CROMI023-19, CROMI024-19,<br>CROMI025-19, CROMI026-19 | MT920175, MT920176,<br>MT920167, MT920169,<br>MT920170, MT920171 | CROBB110, CROBB113,<br>CROBB114, CROBB115,<br>CROBB116, CROBB117 |
| 29 | Veneridae indet. 3 Rafinesque, 1815                 | CROMI028-19                                                                        | MT920172                                                         | CROBB119                                                         |
| 30 | Veneridae indet. 4 Rafinesque, 1815                 | CROMI055-19                                                                        | MT920174                                                         | CROBB380                                                         |

POLYPLACOPHORA

|    |                                                     |             |          |          |
|----|-----------------------------------------------------|-------------|----------|----------|
| 31 | <i>Acanthochitona fascicularis</i> (Linnaeus, 1767) | CROMI037-19 | MT920117 | CROBB139 |
|----|-----------------------------------------------------|-------------|----------|----------|

---

**Table S4.** Inter- and intraspecific genetic p-distances of the mitochondrial cytochrome oxidase I (*cox-1*) gene fragments recorded for gastropod species (numbers in bold show intraspecific p-distance values).

| Species                          | 1a            | 1b     | 2a            | 2b     | 3a            | 3b     | 4a            | 4b     | 5a            | 5b            | 5c            |
|----------------------------------|---------------|--------|---------------|--------|---------------|--------|---------------|--------|---------------|---------------|---------------|
| 1a. <i>Crisilla cf. maculata</i> | -             | -      | -             | -      | -             | -      | -             | -      | -             | -             | -             |
| 1b. <i>Crisilla cf. maculata</i> | <b>0.0030</b> | -      | -             | -      | -             | -      | -             | -      | -             | -             | -             |
| 2a. <i>Phorcus turbinatus</i>    | 0.2492        | 0.2492 | -             | -      | -             | -      | -             | -      | -             | -             | -             |
| 2b. <i>Phorcus turbinatus</i>    | 0.2560        | 0.2540 | <b>0.0000</b> | -      | -             | -      | -             | -      | -             | -             | -             |
| 3a. <i>Gibbula turbinoides</i>   | 0.2371        | 0.2371 | 0.1535        | 0.1452 | -             | -      | -             | -      | -             | -             | -             |
| 3b. <i>Gibbula turbinoides</i>   | 0.2356        | 0.2356 | 0.1520        | 0.1431 | <b>0.0015</b> | -      | -             | -      | -             | -             | -             |
| 4a. <i>Megastomia winfriedi</i>  | 0.2912        | 0.2897 | 0.3112        | 0.3144 | 0.3097        | 0.3082 | -             | -      | -             | -             | -             |
| 4b. <i>Megastomia winfriedi</i>  | 0.2962        | 0.2947 | 0.3115        | 0.3144 | 0.3053        | 0.3038 | <b>0.0077</b> | -      | -             | -             | -             |
| 5a. <i>Rissoella</i> sp.         | 0.3039        | 0.3070 | 0.3194        | 0.3375 | 0.3163        | 0.3147 | 0.2848        | 0.2853 | -             | -             | -             |
| 5b. <i>Rissoella</i> sp.         | 0.3050        | 0.3080 | 0.3235        | 0.3388 | 0.3158        | 0.3142 | 0.2844        | 0.2864 | <b>0.0078</b> | -             | -             |
| 5c. <i>Rissoella</i> sp.         | 0.3050        | 0.3080 | 0.3220        | 0.3388 | 0.3142        | 0.3127 | 0.2875        | 0.2879 | <b>0.0186</b> | <b>0.0232</b> | -             |
| 5d. <i>Rissoella</i> sp.         | 0.3003        | 0.3034 | 0.3220        | 0.3388 | 0.3220        | 0.3204 | 0.2844        | 0.2848 | <b>0.0217</b> | <b>0.0232</b> | <b>0.0186</b> |

**Table S5.** Inter- and intraspecific genetic p-distances of the mitochondrial cytochrome oxidase I (*cox-1*) gene fragments recorded for bivalve species *M. costulatus*, *M. galloprovincialis* and *C. calyculata* (numbers in bold show intraspecific p-distance values).

| Species                              | 1a            | 1b     | 2a            | 2b            | 2c     | 3a            | 3b            | 3c            | 3d            | 3e            |
|--------------------------------------|---------------|--------|---------------|---------------|--------|---------------|---------------|---------------|---------------|---------------|
| 1a. <i>Musculus cf. costulatus</i>   | -             | -      | -             | -             | -      | -             | -             | -             | -             | -             |
| 1b. <i>Musculus cf. costulatus</i>   | <b>0.0000</b> | -      | -             | -             | -      | -             | -             | -             | -             | -             |
| 2a. <i>Mytilus galloprovincialis</i> | 0.3419        | 0.3419 | -             | -             | -      | -             | -             | -             | -             | -             |
| 2b. <i>Mytilus galloprovincialis</i> | 0.3374        | 0.3374 | <b>0.0106</b> | -             | -      | -             | -             | -             | -             | -             |
| 2c. <i>Mytilus galloprovincialis</i> | 0.3404        | 0.3404 | <b>0.0272</b> | <b>0.0242</b> | -      | -             | -             | -             | -             | -             |
| 3a. <i>Cardita calyculata</i>        | 0.4515        | 0.4515 | 0.4022        | 0.4006        | 0.4006 | -             | -             | -             | -             | -             |
| 3b. <i>Cardita calyculata</i>        | 0.4499        | 0.4499 | 0.4006        | 0.3991        | 0.3991 | <b>0.0031</b> | -             | -             | -             | -             |
| 3c. <i>Cardita calyculata</i>        | 0.4506        | 0.4506 | 0.3997        | 0.3981        | 0.3981 | <b>0.0031</b> | <b>0.0000</b> | -             | -             | -             |
| 3d. <i>Cardita calyculata</i>        | 0.4522        | 0.4522 | 0.3966        | 0.3951        | 0.3951 | <b>0.0139</b> | <b>0.0108</b> | <b>0.0108</b> | -             | -             |
| 3e. <i>Cardita calyculata</i>        | 0.4515        | 0.4515 | 0.3945        | 0.3929        | 0.3929 | <b>0.0108</b> | <b>0.0077</b> | <b>0.0077</b> | <b>0.0031</b> | -             |
| 3f. <i>Cardita calyculata</i>        | 0.4506        | 0.4506 | 0.3951        | 0.3935        | 0.3935 | <b>0.0123</b> | <b>0.0093</b> | <b>0.0093</b> | <b>0.0015</b> | <b>0.0015</b> |

**Table S6.** Inter- and intraspecific genetic p-distances of the mitochondrial cytochrome oxidase I (*cox-1*) gene fragments recorded for Veneridae (numbers in bold show intraspecific p-distance values).

| TAXON |                    | 1      | 2a            | 2b            | 2c     | 3a            | 3b            | 3c            | 3d            | 3e            | 3f     |
|-------|--------------------|--------|---------------|---------------|--------|---------------|---------------|---------------|---------------|---------------|--------|
| 1     | Veneridae indet. 3 | -      | -             | -             | -      | -             | -             | -             | -             | -             | -      |
| 2a    | Veneridae indet. 1 | 0.3435 | -             | -             | -      | -             | -             | -             | -             | -             | -      |
| 2b    | Veneridae indet. 1 | 0.3389 | <b>0.0076</b> | -             | -      | -             | -             | -             | -             | -             | -      |
| 2c    | Veneridae indet. 1 | 0.3435 | <b>0.0091</b> | <b>0.0076</b> | -      | -             | -             | -             | -             | -             | -      |
| 3a    | Veneridae indet. 2 | 0.3604 | 0.1856        | 0.1825        | 0.1871 | -             | -             | -             | -             | -             | -      |
| 3b    | Veneridae indet. 2 | 0.3595 | 0.1830        | 0.1797        | 0.1814 | <b>0.0016</b> | -             | -             | -             | -             | -      |
| 3c    | Veneridae indet. 2 | 0.3617 | 0.1854        | 0.1824        | 0.1839 | <b>0.0015</b> | <b>0.0000</b> | -             | -             | -             | -      |
| 3d    | Veneridae indet. 2 | 0.3617 | 0.1854        | 0.1824        | 0.1839 | <b>0.0015</b> | <b>0.0000</b> | <b>0.0000</b> | -             | -             | -      |
| 3e    | Veneridae indet. 2 | 0.3617 | 0.1869        | 0.1839        | 0.1854 | <b>0.0031</b> | <b>0.0016</b> | <b>0.0015</b> | <b>0.0015</b> | -             | -      |
| 3f    | Veneridae indet. 2 | 0.3617 | 0.1854        | 0.1824        | 0.1809 | <b>0.0092</b> | <b>0.0082</b> | <b>0.0076</b> | <b>0.0076</b> | <b>0.0091</b> | -      |
| 4     | Veneridae indet. 4 | 0.3389 | 0.3024        | 0.3024        | 0.3024 | 0.3037        | 0.3007        | 0.3009        | 0.3009        | 0.3024        | 0.2994 |
